# Supplementary material for: “Age Related Differences in the Biology of Chronic Graft-Versus-Host Disease After Hematopoietic Stem Cell Transplantation”
Source: PubMed Central journal article supplement (PMC7641628; doi:10.3389/fimmu.2020.571884), 2020-10-16
Supplement: DataSheet_1.pdf [file DataSheet_1.pdf]

| <b>Supplemental Table 1. Direct Comparison Analysis of Adult versus pediatric Cohorts for T cell populations at Measured at day 100 after HSCT</b>                                                                                           |                                                                                             |                                              |                                                          |
|----------------------------------------------------------------------------------------------------------------------------------------------------------------------------------------------------------------------------------------------|---------------------------------------------------------------------------------------------|----------------------------------------------|----------------------------------------------------------|
| Cell population                                                                                                                                                                                                                              |                                                                                             | Pediatric – (N = 241) <sup>2</sup>           | Adult – (N = 97) <sup>3</sup>                            |
| <b>Naive T cell populations</b>                                                                                                                                                                                                              |                                                                                             |                                              |                                                          |
| <i>Naïve Th cells</i>                                                                                                                                                                                                                        | CD31 <sup>-</sup> CD45RA <sup>+</sup> CD4 <sup>+</sup>                                      | <b>Increased</b><br>1.6 (0.02)<br>0.68       | <b>Increased</b><br>2.0 (0.003) <sup>1</sup><br>0.68     |
| <i>RTE Naïve Th cells</i>                                                                                                                                                                                                                    | CD31 <sup>+</sup> CD45RA <sup>+</sup> CD4 <sup>+</sup>                                      | <b>Decreased (NS)</b><br>0.67 (0.05)<br>0.59 | <b>Increased</b><br>2.0 (p = 0.009) <sup>1</sup><br>0.66 |
| <i>PD1<sup>-</sup> Naïve Th cells</i>                                                                                                                                                                                                        | PD1 <sup>-</sup> CD4 <sup>+</sup> CD45RA <sup>+</sup>                                       | <b>NS</b><br>In cGvHD                        | <b>Increased</b><br>1.9 (0.002)<br>0.69                  |
| <b>Memory T cell populations</b>                                                                                                                                                                                                             |                                                                                             |                                              |                                                          |
| <i>PD1<sup>-</sup> memory Th cells</i>                                                                                                                                                                                                       | PD1 <sup>-</sup> CD4 <sup>+</sup> CD45RA <sup>-</sup>                                       | <b>NS</b><br>In cGvHD                        | <b>Increased</b><br>1.3 (0.003)<br>0.68                  |
| <i>PD1<sup>+</sup> Memory Th cells</i>                                                                                                                                                                                                       | PD1 <sup>+</sup> CD4 <sup>+</sup> CD45RA <sup>-</sup>                                       | <b>NS</b><br>In cGvHD                        | <b>Decreased</b><br>0.70 (0.0007)<br>0.70                |
| <b>Treg cells</b>                                                                                                                                                                                                                            |                                                                                             |                                              |                                                          |
| <i>All Memory T<sub>reg</sub> populations</i>                                                                                                                                                                                                | CD45RA <sup>-</sup> CD4 <sup>+</sup> CD25 <sup>+</sup> CD127 <sup>-</sup>                   | <b>NS</b><br>In cGvHD                        | <b>NS</b><br>in cGvHD                                    |
| <i>Naïve T<sub>reg</sub> populations</i>                                                                                                                                                                                                     | PD1 <sup>-</sup> CD45RA <sup>+</sup> CD4 <sup>+</sup> CD25 <sup>+</sup> CD127 <sup>-</sup>  | <b>NS</b><br>In cGvHD                        | 2.4 (0.0006)<br>0.70                                     |
|                                                                                                                                                                                                                                              | CD31 <sup>+</sup> CD45RA <sup>+</sup> CD4 <sup>+</sup> CD25 <sup>+</sup> CD127 <sup>-</sup> | <b>NS</b><br>In cGvHD                        | 1.6 (0.02)<br>0.63                                       |
| <sup>1</sup> These cohorts had a significantly increased effect ratio and ROC AUC value but the p value by Wilcoxon Rank Sum did not meet significance; <sup>2</sup> Data from reference [7, 8, 22]; <sup>3</sup> Data from reference [4,19] |                                                                                             |                                              |                                                          |

| <b>Supplemental Table 2. Subpopulation Comparison Analysis Based on the Estimated pubertal state at the time of HSCT on cGvHD markers associated with cGvHD at day 100 in the ABLE pediatric Cohort<sup>2</sup></b> |                                                                                                |                                                                                  |                                                                         |
|---------------------------------------------------------------------------------------------------------------------------------------------------------------------------------------------------------------------|------------------------------------------------------------------------------------------------|----------------------------------------------------------------------------------|-------------------------------------------------------------------------|
|                                                                                                                                                                                                                     |                                                                                                | <b>Estimated as Prepubertal<br/>&lt;10.9 years boys<br/>&lt;12.4 years girls</b> | <b>Estimated as Pubertal<br/>≥10.9 years boys<br/>≥12.4 years girls</b> |
| <b>B cell populations</b>                                                                                                                                                                                           |                                                                                                |                                                                                  |                                                                         |
| <i>T1 – Transitional consistent with Breg cells</i>                                                                                                                                                                 | CD10 <sup>hi</sup> CD38 <sup>hi</sup> CD19 <sup>+</sup>                                        | <b>NS</b>                                                                        | <b>NS</b>                                                               |
| <i>CD21 low B cells</i>                                                                                                                                                                                             | CD21 <sup>lo</sup> /CD19cells <sup>2</sup>                                                     | <b>Decreased</b><br>0.38 (0.02)<br>0.80                                          | <b>NS</b>                                                               |
| <i>T2 transitional</i>                                                                                                                                                                                              | CD38 <sup>int</sup> CD10 <sup>int</sup> B cells                                                | <b>Decreased</b><br>0.44 (0.002)<br>0.74                                         | <b>NS</b>                                                               |
| <i>T3 transitional</i>                                                                                                                                                                                              | CD38 <sup>dim</sup> CD10 <sup>lo</sup> B cells                                                 | <b>Decreased</b><br>0.44 (0.0001)<br>0.78                                        | <b>NS</b>                                                               |
| <i>Mature Naïve B cells</i>                                                                                                                                                                                         | IgD <sup>+</sup> CD27 <sup>-</sup>                                                             | <b>Decreased</b><br>0.65 (0.0004)<br>0.79                                        | <b>NS</b>                                                               |
| <i>Unswitched memory/<br/>Marginal-zone like</i>                                                                                                                                                                    | CD27 <sup>+</sup> IgD <sup>+</sup> of CD19 <sup>+</sup>                                        | <b>Increased</b><br>3.7 (0.01)<br>0.62                                           | <b>NS</b>                                                               |
| <i>Classical switched memory</i>                                                                                                                                                                                    | CD27 <sup>+</sup> IgD <sup>-</sup> of CD19 <sup>+</sup>                                        | <b>NS</b>                                                                        | <b>NS</b>                                                               |
| <b>Regulatory NK cells (noncytolytic)</b>                                                                                                                                                                           |                                                                                                |                                                                                  |                                                                         |
| <i>NKreg cells</i>                                                                                                                                                                                                  | CD56hiPlo                                                                                      | <b>Decreased</b><br>0.67 (0.006)<br>0.68                                         | <b>Decreased</b><br>0.68 (0.05)<br>0.69                                 |
| <b>Plasma markers</b>                                                                                                                                                                                               |                                                                                                |                                                                                  |                                                                         |
| <i>Aminopeptidase N (sCD13)</i>                                                                                                                                                                                     |                                                                                                | <b>Increased</b><br>1.6 (0.004)<br>0.67                                          | <b>Increased (NS)</b><br>1.3 (0.11)<br>0.58                             |
| <i>ST2</i>                                                                                                                                                                                                          |                                                                                                | <b>Increased</b><br>1.5 (0.04)<br>0.68                                           | <b>Increased</b><br>1.5 (0.04)<br>0.68                                  |
| <i>CXCL10 or CXCL9</i>                                                                                                                                                                                              |                                                                                                | <b>NS</b>                                                                        | <b>NS</b>                                                               |
| <i>ICAM1</i>                                                                                                                                                                                                        |                                                                                                | <b>Increased</b><br>1.4 (0.01)<br>0.63                                           | <b>NS</b>                                                               |
| <b>Naïve T cells</b>                                                                                                                                                                                                |                                                                                                |                                                                                  |                                                                         |
| <i>Naïve Th cells</i>                                                                                                                                                                                               | CD4 <sup>+</sup> CD31 <sup>-</sup> CD45RA <sup>+</sup>                                         | <b>Increased</b><br>1.5(0.04)<br>0.61                                            | <b>NS</b>                                                               |
| <i>RTE Naïve Th cells</i>                                                                                                                                                                                           | CD4 <sup>+</sup> CD31 <sup>+</sup> CD45RA <sup>+</sup>                                         | <b>Decreased</b><br>0.5 (0.03)<br>0.65                                           | <b>NS</b>                                                               |
| <i>PD1<sup>-</sup> Naïve Th cells</i>                                                                                                                                                                               | CD4 <sup>+</sup> CD45RA <sup>-</sup> PD1 <sup>-</sup>                                          | <b>NS</b>                                                                        | <b>NS</b>                                                               |
| <b>Memory T cells</b>                                                                                                                                                                                               |                                                                                                |                                                                                  |                                                                         |
| <i>PD1<sup>+</sup> memory Th cells</i>                                                                                                                                                                              | CD4 <sup>+</sup> CD45RA <sup>-</sup> PD1 <sup>+</sup>                                          | <b>NS</b>                                                                        | <b>NS</b>                                                               |
| <i>PD1<sup>-</sup> memory Th cells</i>                                                                                                                                                                              | CD4 <sup>+</sup> CD45RA <sup>-</sup> PD1 <sup>-</sup>                                          | <b>NS</b>                                                                        | <b>NS</b>                                                               |
| <b>Treg cells</b>                                                                                                                                                                                                   |                                                                                                |                                                                                  |                                                                         |
| <i>PD1<sup>-</sup> Memory Treg</i>                                                                                                                                                                                  | PD1 <sup>-</sup> CD45RA <sup>-</sup><br>CD4 <sup>+</sup> CD25 <sup>+</sup> CD127 <sup>-</sup>  | <b>Increased</b><br>1.3 (0.02)<br>0.68                                           | <b>Decreased NS<sup>3</sup></b>                                         |
| <i>PD1<sup>+</sup> Memory Treg</i>                                                                                                                                                                                  | PD1 <sup>+</sup> CD45RA <sup>-</sup><br>CD4 <sup>+</sup> CD25 <sup>+</sup> CD127 <sup>-</sup>  | <b>NS</b>                                                                        | <b>Increased</b><br>1.6 (0.009)<br>0.71                                 |
| <i>RTE Naïve Treg</i>                                                                                                                                                                                               | CD31 <sup>+</sup> CD45RA <sup>+</sup> CD4 <sup>+</sup><br>CD25 <sup>+</sup> CD127 <sup>-</sup> | <b>Decreased</b><br>0.44 (0.03)<br>0.65                                          | <b>NS</b>                                                               |

September 19, 2020

<sup>1</sup>The Pubertal status was based on the estimated Tanner staging of the average genital stage 3 for boys at 12.4 years and breast stage 2 at 10.9 years in girls. These Tanner stagers were selected as the onset of accelerated height velocity in the two sexes and the averages selected based on North American standards [16]. <sup>2</sup>Adjusted for the impact of TBI and time of onset of cGvHD post HSCT<sup>3</sup>Increased NS or decreased NS means the value was not significant but trending toward the adult ratio

| <b>Supplemental Table 3. Summary of antibodies used in flow cytometric analysis for both the previously published manuscripts and for the current prospective analyses presented in the manuscript.</b> |                |              |                          |                     |
|---------------------------------------------------------------------------------------------------------------------------------------------------------------------------------------------------------|----------------|--------------|--------------------------|---------------------|
|                                                                                                                                                                                                         | <b>Dye</b>     | <b>AB</b>    | <b>Cat No. / REF No.</b> | <b>Manufacturer</b> |
| 1                                                                                                                                                                                                       | AlexaFluor 488 | CD4          | 344618                   | Biolegend           |
| 2                                                                                                                                                                                                       | APC-Cy7        | CD3          | 300426                   | Biolegend           |
| 3                                                                                                                                                                                                       | PE             | CD197 (CCR7) | 353204                   | Biolegend           |
| 4                                                                                                                                                                                                       | PerCPCy5.5     | CD127        | 351322                   | Biolegend           |
| 5                                                                                                                                                                                                       | PE             | CD337        | 325208                   | Biolegend           |
| 6                                                                                                                                                                                                       | BV421          | CD335        | 331914                   | Biolegend           |
| 7                                                                                                                                                                                                       | BV510          | IgD          | 348220                   | Biolegend           |
| 8                                                                                                                                                                                                       | FITC           | CD21         | 354910                   | Biolegend           |
| 9                                                                                                                                                                                                       | PE             | CD25         | 356104                   | Biolegend           |
| 10                                                                                                                                                                                                      | APC-eFluor 780 | CD14         | 47-0149-42               | eBioscience         |
| 11                                                                                                                                                                                                      | BV421          | CD13         | 582598                   | BD                  |
| 12                                                                                                                                                                                                      | BV785          | CD19         | 302240                   | Biolegend           |
| 13                                                                                                                                                                                                      | Pacific Blue   | CD19         | 302232                   | Biolegend           |
| 14                                                                                                                                                                                                      | AlexaFluor 647 | CD45         | 304018                   | Biolegend           |
| 15                                                                                                                                                                                                      | AlexaFluor 647 | CD69         | 310918                   | Biolegend           |
| 16                                                                                                                                                                                                      | PE             | CD66b        | 305105                   | Biolegend           |
| 17                                                                                                                                                                                                      | AlexaFluor 488 | CD56         | 304611                   | Biolegend           |
| 18                                                                                                                                                                                                      | PE             | CD56         | 304606                   | Biolegend           |
| 19                                                                                                                                                                                                      | FITC           | CD45RA       | 304106                   | Biolegend           |
| 20                                                                                                                                                                                                      | PB             | CD45RA       | 304123                   | BioLegend           |
| 21                                                                                                                                                                                                      | BV785          | CD27         | 302832                   | Biolegend           |
| 22                                                                                                                                                                                                      | BV421          | CD31         | 303124                   | Biolegend           |
| 23                                                                                                                                                                                                      | PE             | CD38         | 303506                   | Biolegend           |
| 24                                                                                                                                                                                                      | APC            | CD10         | 312210                   | Biolegend           |
| 25                                                                                                                                                                                                      | PerCP          | CD5          | 300618                   | Biolegend           |
| 26                                                                                                                                                                                                      | PerCP          | CD3          | 300428                   | Biolegend           |
| 27                                                                                                                                                                                                      | Pacific Blue   | CD8a         | 301033                   | Biolegend           |
| 28                                                                                                                                                                                                      | BV510          | CD8a         | 301048                   | Biolegend           |
| 29                                                                                                                                                                                                      | BV785          | CD4          | 317442                   | Biolegend           |
| 30                                                                                                                                                                                                      | AlexaFluor488  | Perforin     | 308108                   | Biolegend           |
| 31                                                                                                                                                                                                      | AlexaFluor647  | GranzymeB    | 515406                   | BD                  |
| 32                                                                                                                                                                                                      | AlexaFluor 647 | PD-1(CD279)  | 329910                   | Biolegend           |
